# Supplementary material
Source: MDPI journal article supplement (https://www.mdpi.com/2410-3888/7/6/399)
Supplement: s1 [file s1]

# Predicting Sex-Related Transcripts in the Chinese Giant Salamander (*Andrias davidianus*): A Transcriptomics Study, Selection Gender for Preservation, Breeding and Reintroduction

Hu Zhao <sup>1</sup>, Jiqin Huang <sup>1</sup>, Cheng Fang <sup>1</sup>, Hongying Ma <sup>1</sup>, Han Zhang <sup>1</sup>, Jie Deng <sup>1</sup>, Wei Jiang <sup>1</sup>, Fei Kong <sup>1</sup>, Hongxing Zhang <sup>1</sup>, Hong Liu <sup>2</sup> and Qijun Wang <sup>1,2,\*</sup>

<sup>1</sup> Shaanxi Key Laboratory for Animal Conservation, Shaanxi Institute of Zoology, Xi'an 710032, China  
<sup>2</sup> Key Lab of Agricultural Animal Genetics, Breeding and Reproduction of Ministry of Education, College of Fisheries, Huazhong Agricultural University, Wuhan 430070, China  
\* Correspondence: wangqijun@xab.ac.cn or wqjab1@126.com

**Table S1.** Sequencing data statistics of *Andrias davidianus* with three males and three females.

| BMK-ID | Read number | Base number   | GC content | % ≥ Q30 |
|--------|-------------|---------------|------------|---------|
| M-1    | 26,600,554  | 7,421,353,584 | 48.34%     | 91.53%  |
| M-2    | 25,047,421  | 6,991,726,842 | 48.85%     | 91.63%  |
| M-3    | 28,141,691  | 7,863,982,016 | 50.34%     | 90.76%  |
| F-1    | 29,290,482  | 8,187,093,220 | 49.61%     | 92.08%  |
| F-2    | 28,217,103  | 7,878,956,132 | 48.66%     | 92.24%  |
| F-3    | 31,917,900  | 8,917,228,336 | 50.07%     | 91.98%  |

**Table S2.** *De novo* Assembly of *Andrias davidianus* transcript and unigenes.

| Length Range | Transcript     | Unigene        |
|--------------|----------------|----------------|
| 200–300      | 25,073(20.18%) | 22,110(27.07%) |
| 300–500      | 19,928(16.04%) | 14,191(17.38%) |
| 500–1000     | 27,181(21.88%) | 17,724(21.70%) |
| 1000–2000    | 23,338(18.78%) | 13,284(16.27%) |
| 2000+        | 28,719(23.12%) | 14,362(17.59%) |
| Total Number | 124,239        | 81,671         |
| Total Length | 177,584,245    | 96,226,355     |
| N50 Length   | 2,722          | 2,341          |
| Mean Length  | 1429.38        | 1178.22        |

**Table S3.** Statistics table of sequencing data of *Andrias davidianus*.

| BMK-ID | Clean reads | Mapped reads | Mapped ratio |
|--------|-------------|--------------|--------------|
| M-1    | 26,600,554  | 21,071,532   | 79.21%       |
| M-2    | 25,047,421  | 20,260,614   | 80.89%       |
| M-3    | 28,141,691  | 20,857,954   | 74.12%       |
| F-1    | 29,290,482  | 24,611,936   | 84.03%       |
| F-2    | 28,217,103  | 22,914,688   | 81.21%       |
| F-3    | 31,917,900  | 26,756,456   | 83.83%       |

**Table S4.** GO terms of biological process of differentially expressed genes (DEGs) in the gonadal tissue of *Andrias davidianus* with two sexes.

| GO ID      | Term                                           | Annotated genes | Significant genes | Expected value | p-value  |
|------------|------------------------------------------------|-----------------|-------------------|----------------|----------|
| GO:0006412 | Translation                                    | 346             | 139               | 150.64         | 5.50E-05 |
| GO:0048703 | embryonic viscerocranium morphogenesis         | 15              | 14                | 6.53           | 6.90E-05 |
| GO:0030509 | BMP signaling pathway                          | 36              | 27                | 15.67          | 0.00011  |
| GO:0019432 | triglyceride biosynthetic process              | 7               | 7                 | 3.05           | 0.00064  |
| GO:0051225 | spindle assembly                               | 17              | 14                | 7.4            | 0.00097  |
| GO:0034502 | protein localization to chromosome             | 9               | 9                 | 3.92           | 0.00107  |
| GO:0006470 | protein dephosphorylation                      | 71              | 40                | 30.91          | 0.00164  |
| GO:0044786 | cell cycle DNA replication                     | 7               | 7                 | 3.05           | 0.00251  |
| GO:0001934 | positive regulation of protein phosphorylation | 130             | 65                | 56.6           | 0.00296  |
| GO:0007062 | sister chromatid cohesion                      | 12              | 10                | 5.22           | 0.00318  |
| GO:0007184 | SMAD protein import into nucleus               | 5               | 5                 | 2.18           | 0.00351  |
| GO:0048752 | semicircular canal morphogenesis               | 6               | 6                 | 2.61           | 0.00421  |
| GO:0051216 | cartilage development                          | 61              | 39                | 26.56          | 0.00428  |
| GO:0006029 | proteoglycan metabolic process                 | 23              | 17                | 10.01          | 0.00588  |
| GO:0050686 | negative regulation of mRNA processing         | 11              | 8                 | 4.79           | 0.00608  |
| GO:0000070 | mitotic sister chromatid segregation           | 14              | 11                | 6.1            | 0.00654  |
| GO:0006265 | DNA topological change                         | 5               | 5                 | 2.18           | 0.00658  |
| GO:0035195 | gene silencing by miRNA                        | 11              | 8                 | 4.79           | 0.0078   |
| GO:0043085 | positive regulation of catalytic activity      | 217             | 113               | 94.48          | 0.00878  |
| GO:0009154 | purine ribonucleotide catabolic process        | 306             | 137               | 133.23         | 0.00882  |
| GO:0007338 | single fertilization                           | 16              | 11                | 6.97           | 0.0091   |
| GO:0007265 | Ras protein signal transduction                | 134             | 75                | 58.34          | 0.00916  |
| GO:0048705 | skeletal system morphogenesis                  | 76              | 50                | 33.09          | 0.00948  |
| GO:0010453 | regulation of cell fate commitment             | 10              | 7                 | 4.35           | 0.00979  |
| GO:0006817 | phosphate ion transport                        | 5               | 5                 | 2.18           | 0.00983  |

**Table S5.** GO terms of cellular component of differentially expressed genes (DEGs) in the gonadal tissue of *Andrias davidianus* with two sexes.

| GO ID      | Term                              | Annotated genes | Significant genes | Expected value | p-value |
|------------|-----------------------------------|-----------------|-------------------|----------------|---------|
| GO:0005840 | ribosome                          | 206             | 90                | 91.8           | 0.0002  |
| GO:0022625 | cytosolic large ribosomal subunit | 53              | 21                | 23.62          | 0.0014  |
| GO:0022627 | cytosolic small ribosomal subunit | 38              | 16                | 16.93          | 0.0036  |
| GO:0032133 | chromosome passenger complex      | 5               | 5                 | 2.23           | 0.0073  |

**Table S6.** GO terms of molecular function of differentially expressed genes (DEGs) in the gonadal tissue of *Andrias davidianus* with two sexes.

| GO ID      | Term                                                   | Annotated genes | Significant genes | Expected value | p-value |
|------------|--------------------------------------------------------|-----------------|-------------------|----------------|---------|
| GO:0005543 | phospholipid binding                                   | 172             | 98                | 74             | 0.0008  |
| GO:0005160 | transforming growth factor beta receptor binding       | 6               | 6                 | 2.58           | 0.0031  |
| GO:0003677 | DNA binding                                            | 633             | 296               | 272.35         | 0.0049  |
| GO:0004721 | phosphoprotein phosphatase activity                    | 97              | 44                | 41.73          | 0.0052  |
| GO:0008378 | galactosyltransferase activity                         | 6               | 6                 | 2.58           | 0.0053  |
| GO:0003729 | mRNA binding                                           | 27              | 17                | 11.62          | 0.0053  |
| GO:0003916 | DNA topoisomerase activity                             | 5               | 5                 | 2.15           | 0.006   |
| GO:0051920 | peroxiredoxin activity                                 | 8               | 6                 | 3.44           | 0.0063  |
| GO:0008375 | acetylglucosaminyltransferase activity                 | 16              | 12                | 6.88           | 0.0065  |
| GO:0043168 | anion binding                                          | 1384            | 620               | 595.47         | 0.0075  |
| GO:0097367 | carbohydrate derivative binding                        | 1134            | 491               | 487.91         | 0.0075  |
| GO:0036094 | small molecule binding                                 | 1479            | 661               | 636.35         | 0.0083  |
| GO:0003876 | AMP deaminase activity                                 | 3               | 3                 | 1.29           | 0.0089  |
| GO:1901677 | phosphate transmembrane transporter activity           | 10              | 8                 | 4.3            | 0.0091  |
| GO:0008138 | protein tyrosine/serine/threonine phosphatase activity | 27              | 18                | 11.62          | 0.0098  |
